# Supplementary material for: Effects of Supervised Exercise on the Development of Hypertensive Disorders of Pregnancy: A Systematic Review and Meta-Analysis
Source: MDPI journal article supplement (doi:10.3390/jcm11030793), 2022-02-01
Supplement: s1 [file s1]

**Supplementary Table S2.** Quality assessment using the Cochrane Risk of Bias Tool for randomized controlled trials.

| First author, year | Adequate random<br>sequence generation | Allocation<br>concealment | Blinding of<br>participants | Blinding of<br>personnel | Blinding of<br>outcome assessors | Incomplete<br>data outcome | Selective<br>reporting | Other |
|--------------------|----------------------------------------|---------------------------|-----------------------------|--------------------------|----------------------------------|----------------------------|------------------------|-------|
| Barakat, 2016      | +                                      | +                         | -                           | +                        | ?                                | +                          | +                      | +     |
| Bhartia, 2019      | ?                                      | ?                         | -                           | ?                        | ?                                | +                          | +                      | ?     |
| de Oliveria, 2012  | +                                      | +                         | -                           | -                        | +                                | +                          | +                      | +     |
| da Silva, 2017     | +                                      | +                         | -                           | -                        | +                                | +                          | +                      | +     |
| Haakstad, 2016     | +                                      | +                         | +                           | +                        | +                                | +                          | +                      | +     |
| Jayashree, 2013    | +                                      | ?                         | -                           | +                        | +                                | +                          | +                      | +     |
| Kasawara, 2013     | +                                      | +                         | -                           | ?                        | ?                                | +                          | +                      | ?     |
| Maharana, 2013     | +                                      | ?                         | -                           | +                        | +                                | +                          | +                      | +     |
| Perales, 2020      | +                                      | ?                         | -                           | +                        | +                                | +                          | +                      | +     |

|                 |   |   |   |   |   |   |   |   |
|-----------------|---|---|---|---|---|---|---|---|
| Price, 2012     | + | + | - | ? | ? | + | + | ? |
| Ruiz, 2013      | + | ? | - | - | ? | + | + | ? |
| Stafne, 2012    | + | + | - | - | + | + | + | ? |
| Rakhshani, 2013 | ? | ? | - | + | + | + | + | + |
| Tomic, 2013     | ? | ? | - | ? | ? | + | + | ? |
| Wang, 2017      | + | + | - | - | ? | + | + | ? |
| Yeo, 2000       | ? | ? | - | ? | ? | + | + | ? |
