# Supplementary material for: Effects of Supervised Exercise on the Development of Hypertensive Disorders of Pregnancy: A Systematic Review and Meta-Analysis
Source: MDPI journal article supplement (doi:10.3390/jcm11030793), 2022-02-01
Supplement: s1 [file s1]

**Supplementary Figure S1. Search Strategy (Medline).**

"physic\* exercis\*" OR exercis\* OR "physic\* activ\*" OR physic\* activ\* OR physic\* effort\*  
OR exp "physical exertion"/ OR train\* OR fit\* OR fitness OR sport\* OR streng\* OR exp "cool-  
down exercise"/ OR exp gymnastic/ OR exp "muscle stretching exercise"/ OR exp running/ OR  
exp swimming/ OR exp walking/ OR exp "warm-up exercise"/ OR exp "resistance training"/  
OR exp "plyometric exercise"/ OR exp "circuit-based exercise"/ OR exp exercise/ OR exp  
"exercise movement techniques"/ OR exp sports/ OR exp running/ OR exp jogging/ OR run\*  
OR jog\* OR walk\* OR stretch\* OR tennis OR athletic\* OR bicycle OR cycle OR cycling OR  
tai chi OR yoga OR pilates OR climb\* OR workout\* OR danc\* OR ballet\* OR box\* OR  
kickbox\* OR "weight\* lift"

AND

pre-eclamp\* OR preeclamp\* OR tox?emia\* OR exp "hypertension, pregnancy-induced"/ OR  
exp "pre-eclampsia"/ OR exp toxemia/ OR eclamp\* OR exp eclampsia/ OR edema-proteinuria-  
hypertension gestosis OR edema proteinuria hypertension gestosis OR exp "HELLP  
syndrome"/ OR pregnancy induced hypertension OR Gestational Hypertension OR Transient  
Hypertension, Pregnancy OR EPH Complex OR EPH Gestosis OR Hypertension Edema  
Proteinuria Gestosis OR pregnan\* AND hypertens\*
