# Supplementary material for: Effects of Supervised Exercise on the Development of Hypertensive Disorders of Pregnancy: A Systematic Review and Meta-Analysis
Source: MDPI journal article supplement (doi:10.3390/jcm11030793), 2022-02-01
Supplement: s1 [file s1]

**Supplementary Table S4:** Characteristics of the included studies.

| <u>Study</u>             | <u>Country</u> | <u>Setting</u> | <u>Number of participants</u> | <u>Mean age (years)</u> | <u>Mean BMI (kg/m2)</u> | <u>Ethni city</u> | <u>Type of HDP</u> | <u>Type of exercise</u>        | <u>Weeks' gestation</u> | <u>Supervision frequency</u> | <u>Cumulative Incidence (%) in intervention group</u> | <u>Cumulative Incidence (%) in control group</u> |
|--------------------------|----------------|----------------|-------------------------------|-------------------------|-------------------------|-------------------|--------------------|--------------------------------|-------------------------|------------------------------|-------------------------------------------------------|--------------------------------------------------|
| Barakat, et al. 2016     | Spain          | hospital       | 765                           | 31.7                    | 23.5                    | White             | GH, PE             | aerobic, strength, flexibility | 9 to 38-39              | 3 per week                   | 3 (1,5)                                               | 8 (6,11)                                         |
| Bhartia et al., 2019     | India          | hospital       | 78                            | n/a                     | n/a                     | Indian            | GH                 | yoga                           | 20 to 32                | 1 per week                   | 5 (1,7)                                               | 10 (4,23)                                        |
| de Oliveria et al., 2012 | Brazil         | university     | 171                           | 24.7                    | 23.9                    | n/a               | PE                 | aerobic                        | 13-20 to 32             | 3 per week                   | 8 (4,14)                                              | 9 (4,19)                                         |
| da Silva et al., 2017    | Brazil         | university     | 639                           | 27.1                    | 25.2                    | Mixed             | PE                 | aerobic, strength, flexibility | 16-20 to 32-36          | 3 per week                   | 2 (1,5)                                               | 5 (3,8)                                          |
| Haakstad et al., 2016    | Norway         | university     | 61                            | 32.3                    | 22.9                    | n/a               | PIH                | aerobic, strength, flexibility | 17.6 to 36.5            | 2 per week                   | 8 (4,14)                                              | 8 (2,24)                                         |
| Jayashree et al., 2013   | India          | hospital       | 68                            | 27.4                    | 31                      | Indian            | GH, PE, E          | yoga                           | 12 to 36                | 3 per week                   | 10 (3,36)                                             | 32 (19,47)                                       |
| Kasawara et al., 2013    | Brazil         | hospital       | 116                           | 31.5                    | 33.1                    | Mixed             | PE                 | aerobic                        | 12-20 to term           | 1 per week                   | 14 (7,25)                                             | 14 (7,25)                                        |
| Maharana et al., 2013    | India          | hospital       | 96                            | 25.7                    | 25                      | Indian            | GH                 | yoga                           | 18-20 to term           | 1 per week                   | 6 (2,16)                                              | 11 (5,23)                                        |
| Perales et al., 2020     | Spain          | hospital       | 1348                          | 31.5                    | 23.5                    | White             | GH                 | aerobic, strength, flexibility | 9 to 38-39              | 3 per week                   | 0 (0,1)                                               | 3 (2,4)                                          |
| Price et al., 2012       | USA            | hospital       | 62                            | 29.1                    | 27.7                    | Mixed             | GH                 | aerobic, strength, flexibility | 12-14 to 36 or term     | 4 per week                   | 2 (0,14)                                              | 10 (3,25)                                        |
| Rakhshani et al., 2013   | India          | hospital       | 68                            | 27.5                    | 25.3                    | Indian            | GH, PE, E          | yoga                           | 12 to 28                | 3 per week                   | 10 (3,26)                                             | 45 (30,60)                                       |
| Ruiz et al., 2013        | Spain          | hospital       | 962                           | 31.7                    | 23.6                    | n/a               | GH                 | aerobic, strength, flexibility | 9 to 38-39              | 3 per week                   | 3 (2,5)                                               | 6 (4,9)                                          |
| Stafne et al., 2012      | Norway         | hospital       | 855                           | 30.5                    | 24.8                    | White             | GH, PE             | aerobic, strength, flexibility | 20 to 36                | 1 per week                   | 6 (4,9)                                               | 3 (1,5)                                          |
| Tomic et al., 2013       | Croatia        | multiple       | 334                           | 29.1                    | 22.9                    | White             | GH, PE             | aerobic                        | 6-8 to delivery         | 3 per week                   | 3 (1,7)                                               | 4 (2,8)                                          |

|                          |       |            |     |      |      |       |        |         |             |            |           |            |
|--------------------------|-------|------------|-----|------|------|-------|--------|---------|-------------|------------|-----------|------------|
| <b>Wang et al., 2017</b> | China | hospital   | 300 | 32.3 | 26.8 | Asian | GH, PE | aerobic | 12 to 36-37 | 3 per week | 13 (8,19) | 15 (10,21) |
| <b>Yeo et al., 2000</b>  | USA   | university | 16  | 30   | n/a  | Mixed | GH     | aerobic | 18 to 28    | 3 per week | 13 (2,47) | 13 (2,47)  |
