# Supplementary material for: Effects of Supervised Exercise on the Development of Hypertensive Disorders of Pregnancy: A Systematic Review and Meta-Analysis
Source: MDPI journal article supplement (doi:10.3390/jcm11030793), 2022-02-01
Supplement: s1 [file s1]

**Supplementary Table S3.** Assessment of the risk of bias for each important outcome within studies.

| <b>Study</b>      | <b>Risk of bias</b>                           | <b>Interpretation</b>                                    |
|-------------------|-----------------------------------------------|----------------------------------------------------------|
| Barakat, 2016     | Low risk of bias for all key domains.         | Plausible bias unlikely to seriously affect the results. |
| Bhartia, 2019     | Unclear risk of bias for one or more domains. | Plausible bias that raises some doubt about the results. |
| de Oliveria, 2012 | Low risk of bias for all key domains.         | Plausible bias unlikely to seriously affect the results. |
| da Silva, 2017    | Low risk of bias for all key domains.         | Plausible bias unlikely to seriously affect the results. |
| Haakstad, 2016    | Low risk of bias for all key domains.         | Plausible bias unlikely to seriously affect the results. |
| Jayashree, 2013   | Low risk of bias for all key domains.         | Plausible bias unlikely to seriously affect the results. |
| Kasawara, 2013    | Low risk of bias for all key domains.         | Plausible bias unlikely to seriously affect the results. |
| Maharana, 2013    | Low risk of bias for all key domains.         | Plausible bias unlikely to seriously affect the results. |
| Perales, 2020     | Low risk of bias for all key domains.         | Plausible bias unlikely to seriously affect the results. |
| Price, 2012       | Unclear risk of bias for one or more domains. | Plausible bias that raises some doubt about the results. |
| Ruiz, 2013        | Unclear risk of bias for one or more domains. | Plausible bias that raises some doubt about the results. |
| Stafne, 2012      | Low risk of bias for all key domains.         | Plausible bias unlikely to seriously affect the results. |
| Rakhshani, 2013   | Low risk of bias for all key domains.         | Plausible bias unlikely to seriously affect the results. |
| Tomic, 2013       | Unclear risk of bias for one or more domains. | Plausible bias that raises some doubt about the results. |
| Wang, 2017        | Unclear risk of bias for one or more domains. | Plausible bias that raises some doubt about the results. |
| Yeo, 2000         | Unclear risk of bias for one or more domains  | Plausible bias that raises some doubt about the results. |
