# Supplementary material for: Effects of Supervised Exercise on the Development of Hypertensive Disorders of Pregnancy: A Systematic Review and Meta-Analysis
Source: MDPI journal article supplement (doi:10.3390/jcm11030793), 2022-02-01
Supplement: s1 [file s1]

**Supplementary Table S1.** Characteristics of the exercises in the included studies.

| <b><u>Study</u></b>             | <b><u>Control Group</u></b><br><b><u>Intervention</u></b>        | <b><u>Exercise</u></b><br><b><u>Group</u></b><br><b><u>Intervention</u></b> | <b><u>Inclusion</u></b><br><b><u>Criteria</u></b>                             | <b><u>Exclusion Criteria</u></b>                                                                                                                                       | <b><u>Frequency</u></b><br><b><u>(sessions/week)</u></b> | <b><u>Weekly</u></b><br><b><u>duration</u></b><br><b><u>(mins)</u></b> | <b><u>Programme</u></b><br><b><u>duration</u></b><br><b><u>(weeks)</u></b> | <b><u>Sessions</u></b><br><b><u>(n)</u></b> | <b><u>Adherence</u></b> | <b><u>Aerobic exercise</u></b><br><b><u>Intensity</u></b> |
|---------------------------------|------------------------------------------------------------------|-----------------------------------------------------------------------------|-------------------------------------------------------------------------------|------------------------------------------------------------------------------------------------------------------------------------------------------------------------|----------------------------------------------------------|------------------------------------------------------------------------|----------------------------------------------------------------------------|---------------------------------------------|-------------------------|-----------------------------------------------------------|
| <b>Barakat et al., 2016</b>     | standard antenatal care + advice of positive effects of exercise | warm-up, resistance, strength, cool-down                                    | low-risk pregnancy                                                            | history of risk of preterm delivery, GDM, T1DM, T2DM, multiple or complicated pregnancy                                                                                | 3                                                        | 150-165                                                                | around 30                                                                  | 85                                          | ≥ 80%                   | moderate (RPE=12-14, HR<70% of maximum HR)                |
| <b>Bhartia et al., 2019</b>     | standard antenatal care                                          | yoga                                                                        | low-risk pregnancy                                                            | high-risk pregnancy                                                                                                                                                    | 3                                                        | 150                                                                    | 12                                                                         | 36                                          | not reported            | n/a                                                       |
| <b>de Oliveira et al., 2012</b> | standard antenatal care                                          | warm-up and walking                                                         | healthy pregnancy, sedentary on admission, GW<13, singleton                   | smoking, chronic disease, history of premature delivery, fetal abnormalities, placenta praevia, history of vaginal bleeding, hematomas, PROM, cervical length < 2.5 cm | 3                                                        | variable and gradually increased                                       | 12 or 19                                                                   | 36 or 57                                    | ≥ 85%                   | moderate (RPE=12-16, HR=60-80% of maximum HR)             |
| <b>da Silva et al., 2017</b>    | standard antenatal care                                          | warm-up, aerobic, strength, stretching                                      | healthy pregnancy, maternal age >18, not participating in exercise programmes | hypertension, CV disease, diabetes, history of miscarriage or preterm birth, IVF, multiple pregnancy, persistent bleeding, smoking (>20 cigarettes daily), BMI >35     | 3                                                        | 180                                                                    | >16                                                                        | >48                                         | 56.25%                  | moderate (RPE=12-14)                                      |
| <b>Haakstad et al., 2016</b>    | standard antenatal care                                          | warm-up, aerobic dance,                                                     | healthy pregnancy, formerly inactive                                          | high-risk pregnancy                                                                                                                                                    | >2                                                       | >120                                                                   | >12                                                                        | >24                                         | 83.30%                  | moderate (RPE=12-14,                                      |

|                               |                                                 |                                       |                                                                                                                       |                                                                                                                                                    |          |              |              |              |              |                               |
|-------------------------------|-------------------------------------------------|---------------------------------------|-----------------------------------------------------------------------------------------------------------------------|----------------------------------------------------------------------------------------------------------------------------------------------------|----------|--------------|--------------|--------------|--------------|-------------------------------|
|                               |                                                 | strength, cool-down                   |                                                                                                                       |                                                                                                                                                    |          |              |              |              |              | HR<85% of maximum HR)         |
| <b>Jayashree et al., 2013</b> | standard antenatal care + unsupervised walking  | yoga                                  | high-risk pregnancy (multiple pregnancy, maternal age <20 or >35, BMI>30, genetic history of pregnancy complications) | normal pregnancy, anemia, history of clotting disorders, renal/hepatic/heart disease, seizure disorders, structural abnormalities in the pelvis    | 3        | not reported | 12           | 36           | not reported | n/a                           |
| <b>Kasawara et al., 2013</b>  | standard antenatal care                         | aerobic exercise (stationary bicycle) | chronic hypertension and/or history of pre-eclampsia                                                                  | multiple pregnancy, cervical insufficiency, vaginal bleeding, heart disease, SLE, kidney failure, neurological disorders, engaged in supervised PA | 1        | 30           | not reported | 9.24         | not reported | low (HR=20% above resting HR) |
| <b>Maharana et al., 2013</b>  | standard antenatal care + advised to stretching | yoga                                  | healthy pregnancy between 18 and 20 GW, live previous children, primi- or secundi-gravida, previous NVD               | medical problems, multiple pregnancy, IVF, maternal physical abnormalities, fetal abnormalities, previous exposure to yoga or intense PA           | variable | variable     | not reported | not reported | 95%          | n/a                           |

|                               |                                                                            |                                                                                        |                                                                                                                            |                                                                                                                                                                                                                                                             |   |         |          |          |              |                                                      |
|-------------------------------|----------------------------------------------------------------------------|----------------------------------------------------------------------------------------|----------------------------------------------------------------------------------------------------------------------------|-------------------------------------------------------------------------------------------------------------------------------------------------------------------------------------------------------------------------------------------------------------|---|---------|----------|----------|--------------|------------------------------------------------------|
| <b>Perales et al., 2020</b>   | standard antenatal care + nutrition & PA counselling                       | low-impact dance, stretching, toning/resistance training, pelvic floor muscle training | healthy pregnancy, singleton, maternal age between 18 and 35                                                               | any contraindication to perform PA                                                                                                                                                                                                                          | 3 | 150-165 | 29-30    | 87-90    | >95%         | light-to-moderate (RPE=10-12, HR <60% of maximum HR) |
| <b>Price et al., 2012</b>     | standard antenatal care                                                    | step aerobics (day 1), walking (day 3), circuit training (day 3)                       | singleton, BMI<39,                                                                                                         | aerobic exercise for more than once a week for the past 6 months, chronic heart/lung disease, poorly controlled diabetes, hypertension, epilepsy, hyperthyroidism, severe anemia, orthopedic limitations, history of premature delivery, SGA or miscarriage | 4 | 180-240 | variable | variable | 77%          | moderate (RPE=12-14)                                 |
| <b>Rakhshani et al., 2013</b> | standard antenatal care + conventional antenatal exercise advice (walking) | yoga                                                                                   | <12 GW + risk factors (personal or familial history of poor obstetrics outcome, multiple pregnancy, <20 or >35 yo, BMI>30) | severe renal, hepatic, gallbladder or heart disease, structural abnormalities of the respiratory system, hereditary anemia, seizures, STDs, contraindications to perform PA                                                                                 | 3 | 180     | 15       | 45       | not reported | n/a                                                  |
| <b>Ruiz et al., 2013</b>      | standard antenatal care +                                                  | warm-up, aerobic (dance),                                                              | sedentary, single and uncomplicated                                                                                        | any contraindication to perform PA                                                                                                                                                                                                                          | 3 | 150-165 | 29-30    | 85       | >97%         | light-to-moderate (RPE=10-12, HR                     |

|                            |                                                      |                                                  |                                                                         |                                                                                                                                                                                                                                                         |   |     |          |          |                               |                                               |
|----------------------------|------------------------------------------------------|--------------------------------------------------|-------------------------------------------------------------------------|---------------------------------------------------------------------------------------------------------------------------------------------------------------------------------------------------------------------------------------------------------|---|-----|----------|----------|-------------------------------|-----------------------------------------------|
|                            | nutrition & PA counselling                           | resistance, cool-down                            | pregnancy, no high risk of preterm delivery                             |                                                                                                                                                                                                                                                         |   |     |          |          |                               | <60% of maximum HR)                           |
| <b>Stafne et al., 2012</b> | standard antenatal care + nutrition & PA counselling | aerobic (low-impact dance), strength, stretching | white women, aged 18 or older, singleton live fetus                     | high-risk pregnancy and/or disease that could interfere with participation, living more than 30-minutes' drive from the hospitals                                                                                                                       | 1 | 60  | 12       | 12       | 55%                           | moderate (RPE=13-14)                          |
| <b>Tomic et al., 2013</b>  | standard antenatal care                              | warm-up, aerobic exercise, stretching, cool-down | normal pregnancy, good general health, maternal age between 18 and 35   | chronic/acute medical conditions, multiple gestation, persistent bleeding (II or III trimester), placenta praevia (after 26 weeks), poorly controlled hypertension, diabetes, thyroid disease, incompetent cervix, recurrent miscarriage, heavy smokers | 3 | 150 | variable | variable | >80%                          | moderate (RPE=11.9, HR=60-75% of maximum HR)  |
| <b>Wang et al., 2017</b>   | standard antenatal care                              | warm-up, stationary cycling, cool-down           | singleton, non-smoking, BMI $\geq$ 24, >18 yo, $\geq$ 6 weeks gestation | cervical insufficiency, ongoing medication for pre-existing hypertension, diabetes, cardiac disease, systemic lupus erythematosus, thyroid disease, psychosis, ongoing treatment with metformin or corticosteroids, contraindications to PA             | 3 | 90  | 26-27    | 78-81    | >80% (in 90% of participants) | moderate (RPE=12-14, HR=65-75% of maximum HR) |

|                             |                            |                                                                                |                                                                                                                          |                                                                                  |   |    |    |    |     |                      |
|-----------------------------|----------------------------|--------------------------------------------------------------------------------|--------------------------------------------------------------------------------------------------------------------------|----------------------------------------------------------------------------------|---|----|----|----|-----|----------------------|
| <b>Yeo et al.,<br/>2000</b> | standard<br>antenatal care | warm-up, steady<br>state (bicycle<br>ergometer or<br>treadmill), cool-<br>down | history of mild<br>hypertension, GH<br>or family history<br>of hypertensive<br>disorders, <14<br>GW, maternal age<br>>18 | diabetes, renal disease, multiple<br>pregnancy, extremely vigorous<br>exercisers | 3 | 90 | 10 | 30 | 90% | moderate<br>(RPE=13) |
|-----------------------------|----------------------------|--------------------------------------------------------------------------------|--------------------------------------------------------------------------------------------------------------------------|----------------------------------------------------------------------------------|---|----|----|----|-----|----------------------|

GDM=Gestational Diabetes Mellitus; T1DM=Type 1 Diabetes Mellitus; T2DM=Type 2 Diabetes Mellitus2; PROM=Premature Rupture of Membranes; IVF= In Vitro Fertilization; SLE=Systemic Lupus Erythematosus; PA=Physical Activity; NVD=Normal Vaginal Delivery; SGA=Small for Gestational Age; STDs=Sexual Transmitted Diseases; RPE=Rate of Perceived Exertion; HR=Heart Rate; n/a=not applicable.
