# Supplementary figures and images for: Effects of Supervised Exercise on the Development of Hypertensive Disorders of Pregnancy: A Systematic Review and Meta-Analysis
Source: MDPI journal article supplement (doi:10.3390/jcm11030793), 2022-02-01

**Supplementary Figure S2.** Funnel plot for publication bias.

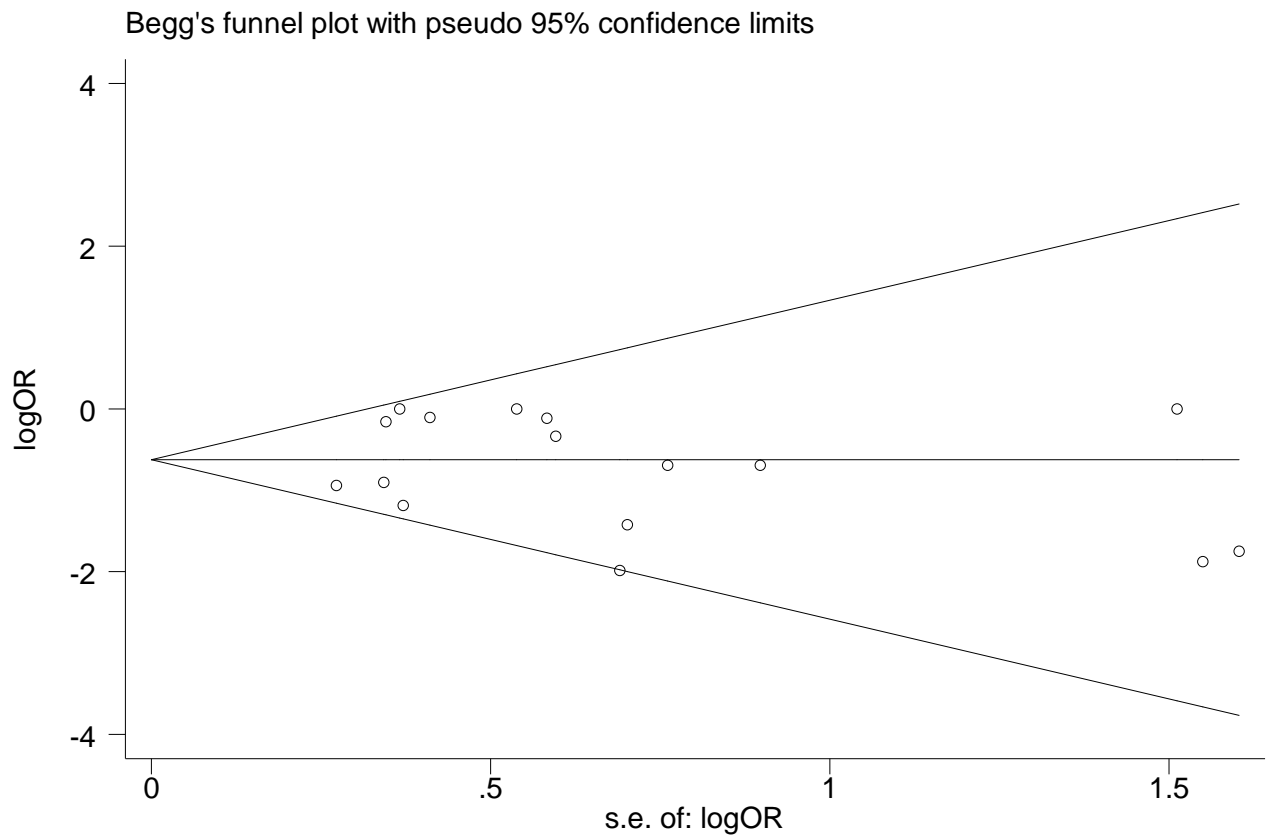

Supplement: s1 [file s1]
